# Supplementary material for: Single-Cell Transcriptomic Analysis of Specific Responses of Different Cell Populations of Hemocytes to the Re-infection of Bacteria, a Case Study in Abalone
Source: Research Square preprint supplement (doi:10.21203/rs.3.rs-4675005/v1), 2024-08-05
Supplement: Supplementary file 1 [file 255bfd2e11d5ccb1061ba683.docx]

**Table S1**

**Primers used in this article**

| **Primer name** | **Nucleotide sequence (5'→3')** | | | **Purpose** |
| --- | --- | --- | --- | --- |
| *TLR2*-RNAi-F | | TGCTACGAATGCCAAGGTGT | RNAi | | |
| *TLR2*-RNAi-R | | GATCCGACACGTCTCTTCGG | RNAi | | |
| *NF-κB*-RNAi-F | | GTGAAGGACAGCGAGGTCAA | RNAi | | |
| *NF-κB*-RNAi-R | | ATGACTGCCAGGTGGATTGG | RNAi | | |
| *EGFP*-RNAi-F | | GGATCCTAATACGACTCACTATAGGGATC | RNAi | | |
| *EGFP*-RNAi-R | | GGATCCTAATACGACTCACTATAGGGATC | RNAi | | |
| *HIF1A*-F | | GACTGGCCACTGGATCGAAA | qPCR | | |
| *HIF1A*-R | | AACAACGGCGGGATCAGATT | qPCR | | |
| *FADD*-F | | GTTGCCTTTTTGTTGCCCCT | qPCR | | |
| *FADD*-R | | TGCTGGTCTGATTGCACCAA | qPCR | | |
| *TRAF6*-F | | CTTCACCGAAGTGTGTCCGA | qPCR | | |
| *TRAF6*-R | | CCCCATCACACCATCAGCAT | qPCR | | |
| *IRAK4*-F | | GGTGCGGCGGATTATTTGTC | qPCR | | |
| *IRAK4*-R | | AATTGTAGCCCGTTCTGCCA | qPCR | | |
| *MyD88*-F | | TGGCAAGCAAGTCGTCAAGT | qPCR | | |
| *MyD88*-R | | TGTAAGCGTCGTACATGGCA | qPCR | | |
| *CASP8*-F | | GATGACTCCTACCGCCAACC | qPCR | | |
| *CASP8*-R | | TTTGTAGCCAAGGTGGGTCC | qPCR | | |
| *Akirin2*-F | | AAACAAGGGAGCCATCGACC | qPCR | | |
| *Akirin2*-R | | TGGCATACACCGTCTTCGTT | qPCR | | |
| *14-3-3ζ*-F | | TAATGCCCGAAAAGGCAGGT | qPCR | | |
| *14-3-3ζ*-R | | CCTGAAGAGGGCATACCGTG | qPCR | | |
| *MKK4*-F | | AGCCCTCCAACATTCTGCTG | qPCR | | |
| *MKK4*-R | | TAAGGTCGACAACCGGCATC | qPCR | | |
| *RIP1*-F | | GGAGGATCAGCCATAGGTGC | qPCR | | |
| *RIP1*-R | | GGTGGTCATCAGGTAAGCCC | qPCR | | |
| *MAPK14*-F | | CAAGAAGCTAGCTCGGCCAT | qPCR | | |
| *MAPK14*-R | | CTGTCGTACGTCTGGTCTGG | qPCR | | |
| *EF1α-F* | | TGCTGTCTGATCGTTGCCT | qPCR | | |
| *EF1α-R* | | GCTGTCCATCTTGTTGATTCCA | qPCR | | |

|  |
| --- |

**Table S2**

**Quality validation of raw reads**

| **Sample** | **Number of Reads** | **Valid Barcodes** | **Sequencing Saturation** | **Q30 Bases in Barcode** | **Q30 Bases in RNA Read** | **Q30 Bases in UMI** |
| --- | --- | --- | --- | --- | --- | --- |
| V_group | 396,266,876 | 97.30% | 68.50% | 94.90% | 90.50% | 94.10% |
| N_group | 414,300,518 | 96.7% | 67.4% | 96.1% | 92.8% | 94.9% |
| NN_group | 447,684,335 | 96.40% | 77.50% | 96.20% | 92.50% | 95.10% |
| NV_group | 421,542,139 | 97.40% | 60.20% | 94.90% | 90.70% | 94.10% |
| VV_group | 368,963,729 | 97.10% | 70.80% | 96.10% | 92.60% | 94.40% |

**Table S3** **Summary information of sample data identified**

| **Sample** | **Estimated Number of Cells** | **Total Genes Detected** | **Reads Mapped Confidently to Genome** |
| --- | --- | --- | --- |
| V_group | 9,483 | 30,492 | 71.3% |
| N_group | 9,547 | 31,814 | 66.7% |
| NN_group | 8,702 | 31,394 | 69.8% |
| NV_group | 8,947 | 31,069 | 75.6% |
| VV_group | 6,200 | 31,247 | 75.5% |

**Table S4 Statistics of receptor-ligand pairs in each sample**

| **N_group** | **V_group** | **NV_group** | **VV_group** |
| --- | --- | --- | --- |
| FGF17_FGFR2 | FGF17_Cad96Ca | FGF17_FGFR | FGF17_Cad96Ca |
| MYPN_MYPN | FGF17_FGFR | FGF17_FGFR2 | FGF17_Cad96Ca |
| transcript22944_SORT1 | FGF17_Ret | FGFR_FGFR2 | FGF17_Cad96Ca |
| COPA_SORT1 | L1cam_L1cam | FGF17_Ret | Cad96Ca_Cad96Ca |
| Unigene0001764_transcript120693 | COPA_SORT1 | FGFR2_Ret | L1cam_L1cam |
| WNT-5A_ FZD1 | transcript154259_transcript120693 | MYPN_MYPN | EGFR_MIF |
| WNT-5A_FZD5 | dvr1_PTPRF | EGFR_MIF | EGFR_GRN |
| WNT-5A_transcript60466 | WNT-5A_PTPRF | EGFR_GRN | EGFR_COPA |
| WNT1_transcript60466 | WNT-5A_FZD2 | EGFR_COPA | ADORA2A_NAMPT |
| WNT-5A_ROR1 | WNT-5A_FZD5 | GRN_SORT1 | GRN_SORT1 |
| FGFR2_EPHA4a | WNT-5A_transcript60466 | COPA_SORT1 | COPA_SORT1 |
| transcript18324_EPHA4A | WNT-5A_ROR1 | CD40LG_Ripk1 | Dl_transcript184750 |
| FGFR2_XPR1 | transcript18324_EPHA4A | WNT-5A_PTPRK | CD40LG_Ripk1 |
| WNT1_RYK | Cad96Ca_EPHA4A | WNT-5A_FZD2 | transcript184750_transcript120693 |
| WNT4_Smo | Ret_EPHA4A | WNT-5A_FZD5 | transcript184750_wnt11b-2 |
| Dl_Unigene0001764 | MIF_transcript173512 | WNT-5A_transcript60466 | BMP3_PTPRK |
| JAG1_Unigene0001764 | NRG1_EGFR | WNT-5A_ROR1 | WNT-5A_PTPRK |
| MIF_transcript173512 | MIMI_R818 | transcript163562_CD40LG | WNT-5A_FZD1 |
| NRG1_EGFR | ADORA1_ENTPD1 | FGFR2_EPHA4A | wnt11b-2_transcript35702_FZD1 |
| MIMI_R818_transcript18324 | ADORA3_ENTPD1 | transcript18324_EPHA4A | WNT-5A_FZD1 |
| transcript22944_nas-39 | C3_transcript71241 | Ret_EPHA4A | WNT-5A_FZD5 |
| ADORA2A_ENTPD1 | transcript71241_RPS19 | FGFR2_XPR1 | WNT-5A_transcript60466 |
| HRH2_ENTPD1 |  | WNT4_Smo | WNT-5A_ROR1 |
| PTPRC_transcript9833 |  | NRG1_EGFR | Cad96Ca_EPHA4A |
|  |  | MIMI_R818 | transcript18324_EPHA4A |
| C3_transcript71241 |  | MIF_transcript173512 | transcript158356_CD40LG |
|  |  | GRN_nas-39 | Cad96Ca_XPR1 |
|  |  | FGFR2_transcript18324 | Cad96Ca_EPHA4A |
|  |  | ADORA2A_ENTPD1 | wnt11b-2_Smo |
|  |  | ADORA3_ENTPD1 | Dl_Unigene0017029 |
|  |  | C3_transcript71241 | transcript120693_Unigene0017029 |
|  |  | transcript71241_RPS19 | MIF_transcript173512 |
|  |  |  | NRG1_EGFR |
|  |  |  | MIMI_R818_transcript18324 |
|  |  |  | GRN_nas-39 |
|  |  |  | ADORA2A_ENTPD1 |
|  |  |  | HRH2_ENTPD1 |
|  |  |  | C3_transcript71241 |
|  |  |  | Ptprc_transcript9833 |
