# Supplementary figures and images for: Single-Cell Transcriptomic Analysis of Specific Responses of Different Cell Populations of Hemocytes to the Re-infection of Bacteria, a Case Study in Abalone
Source: Research Square preprint supplement (doi:10.21203/rs.3.rs-4675005/v1), 2024-08-05

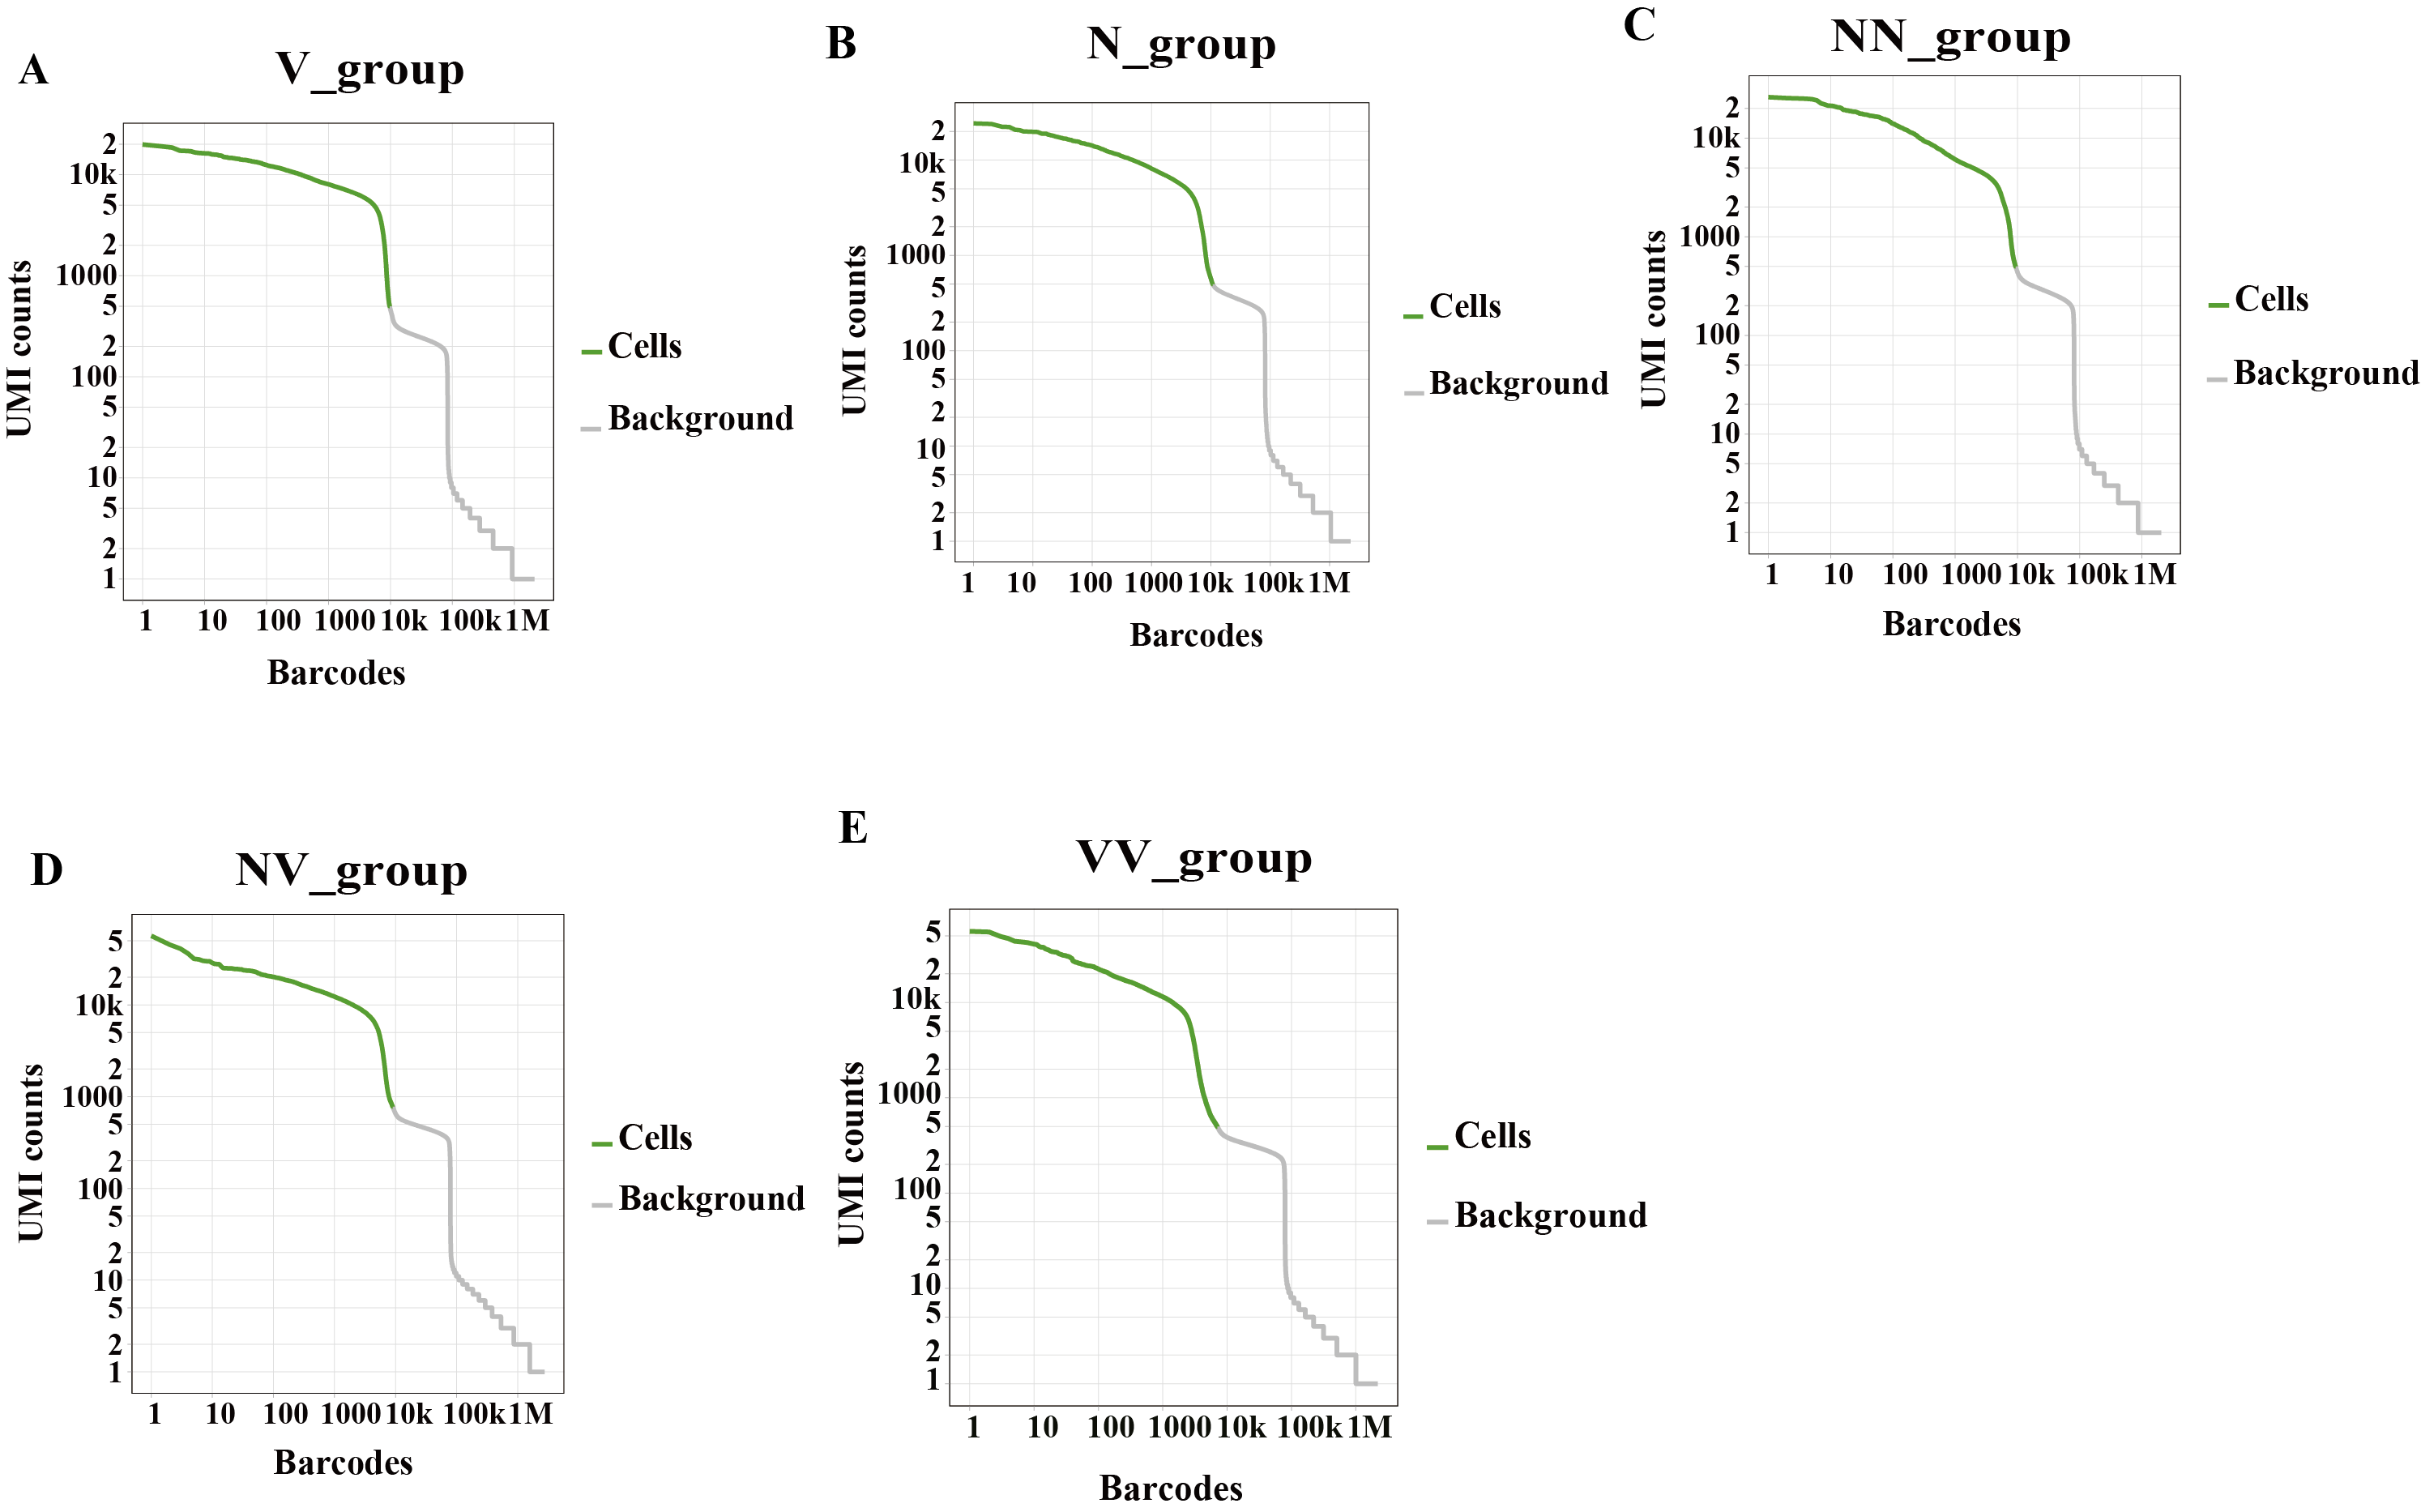


Fig. S1


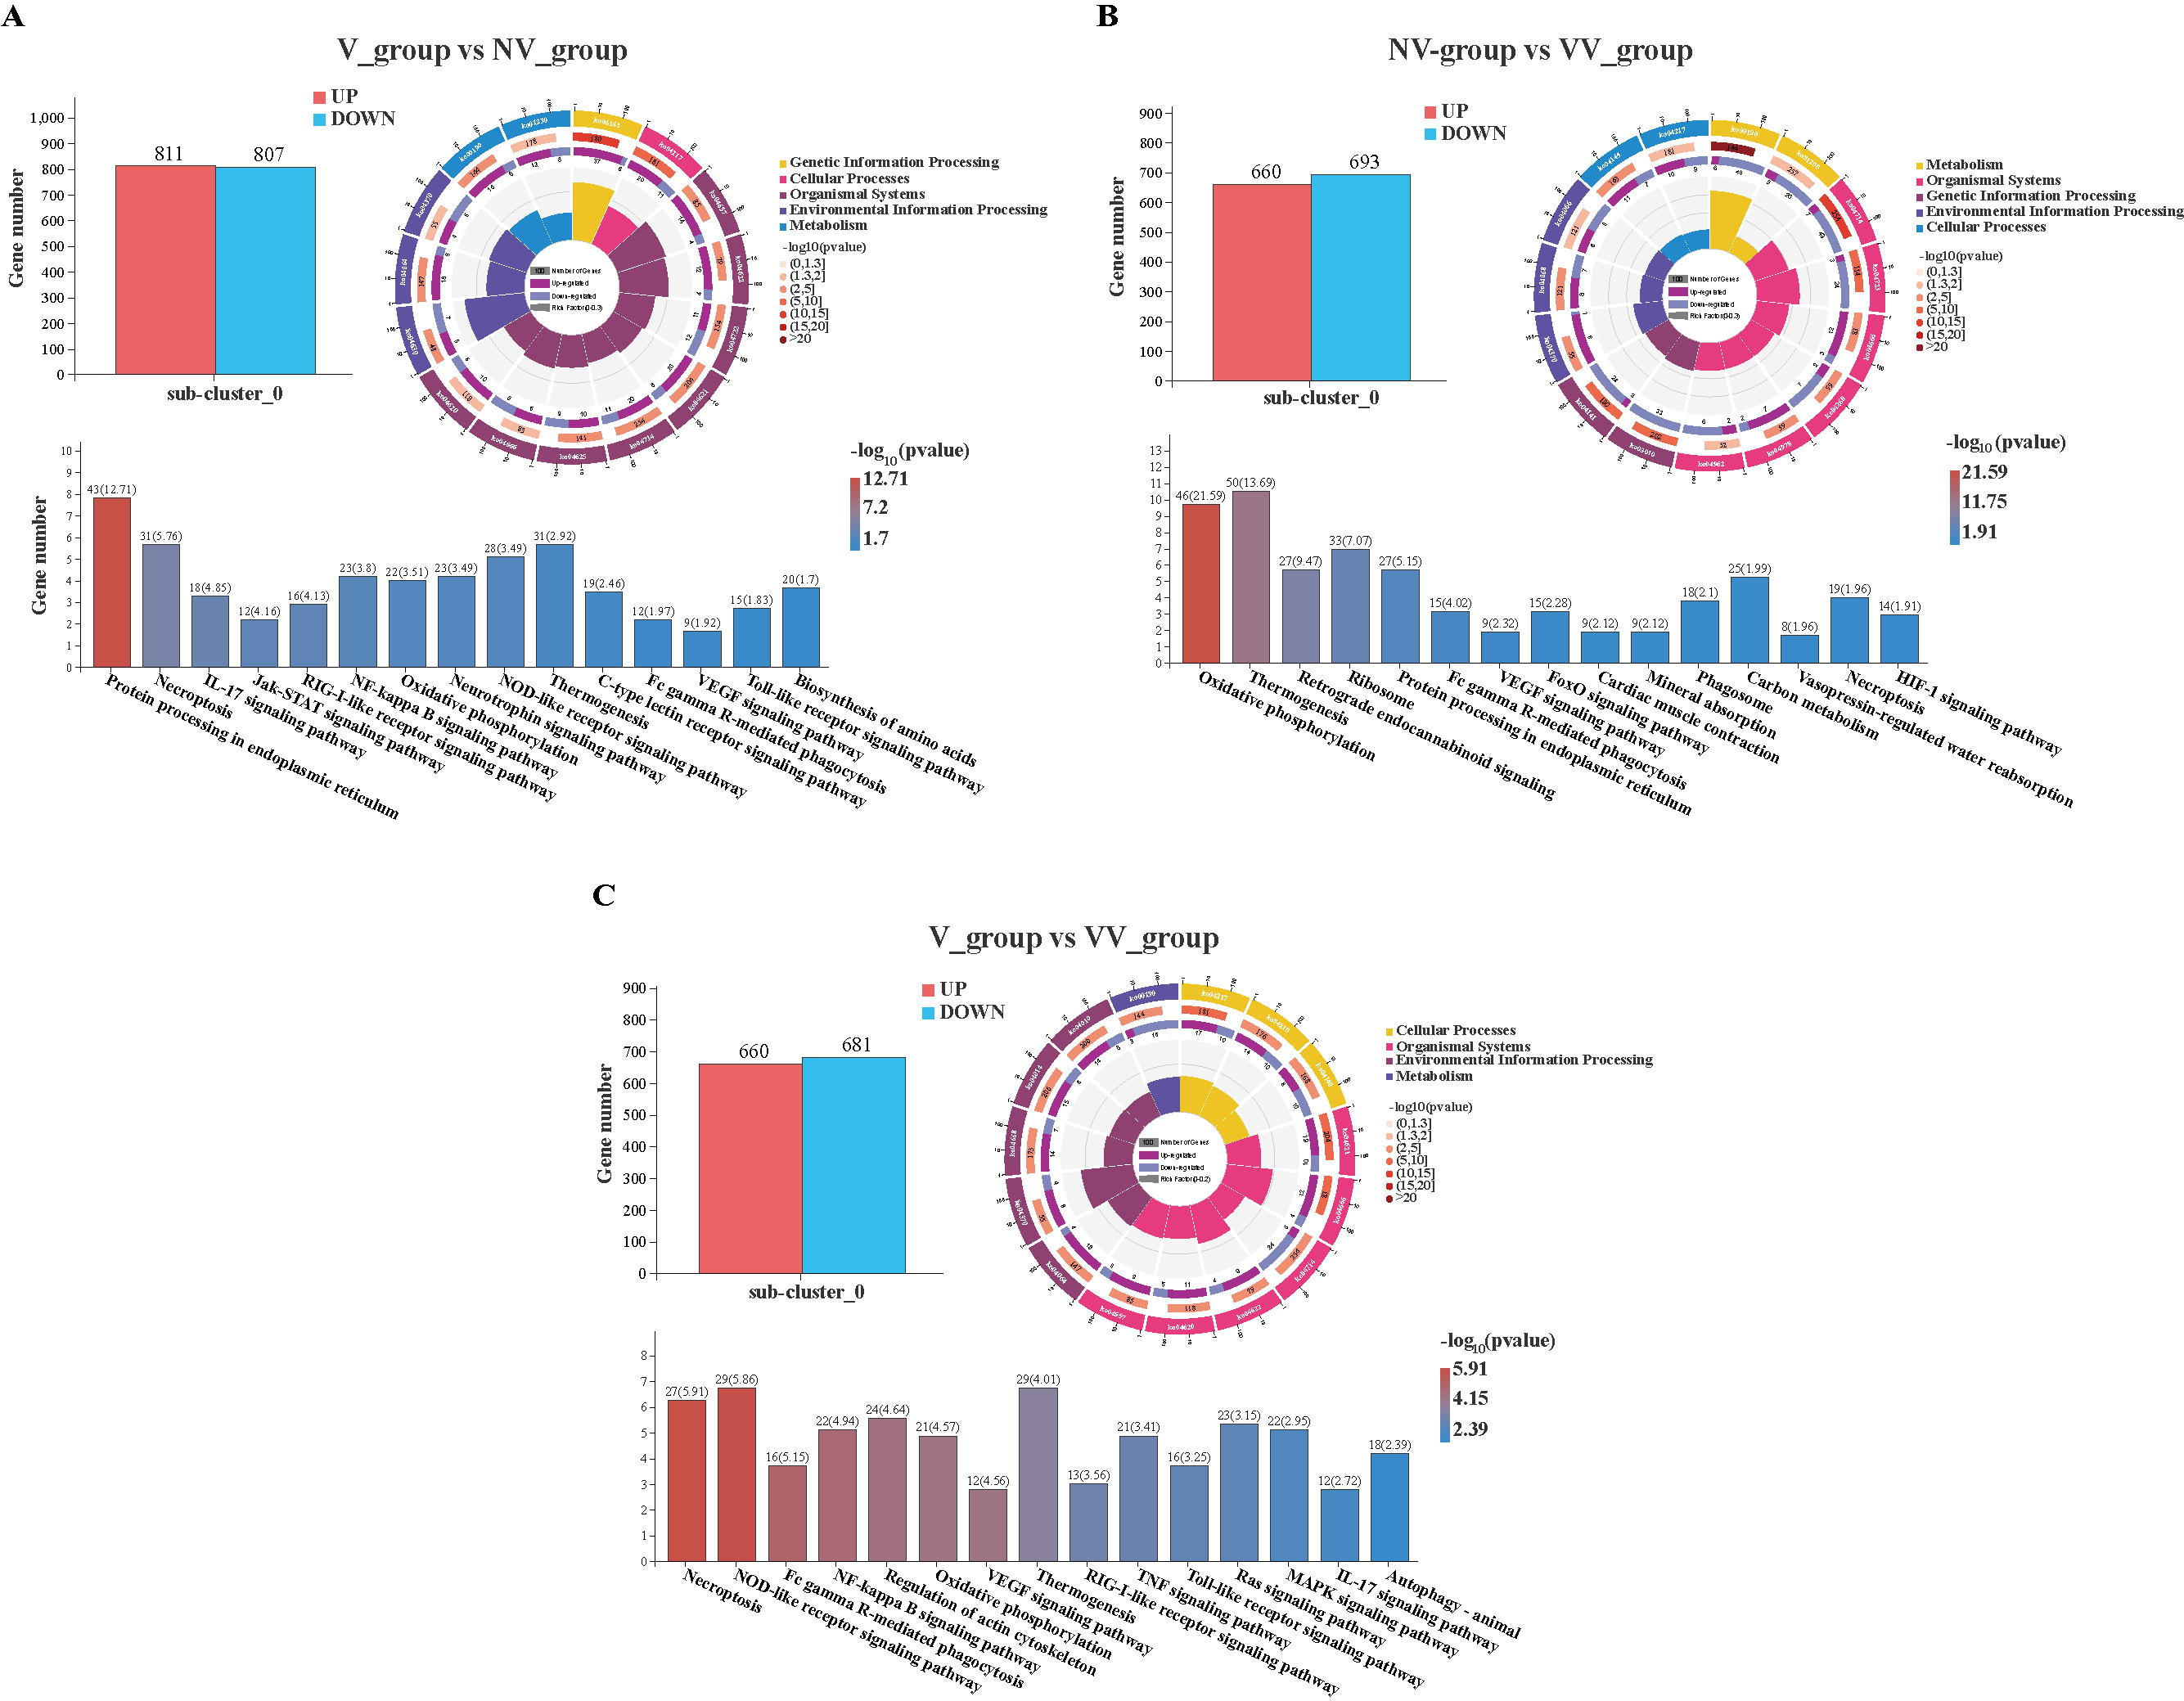


Fig. S2





Fig. S3


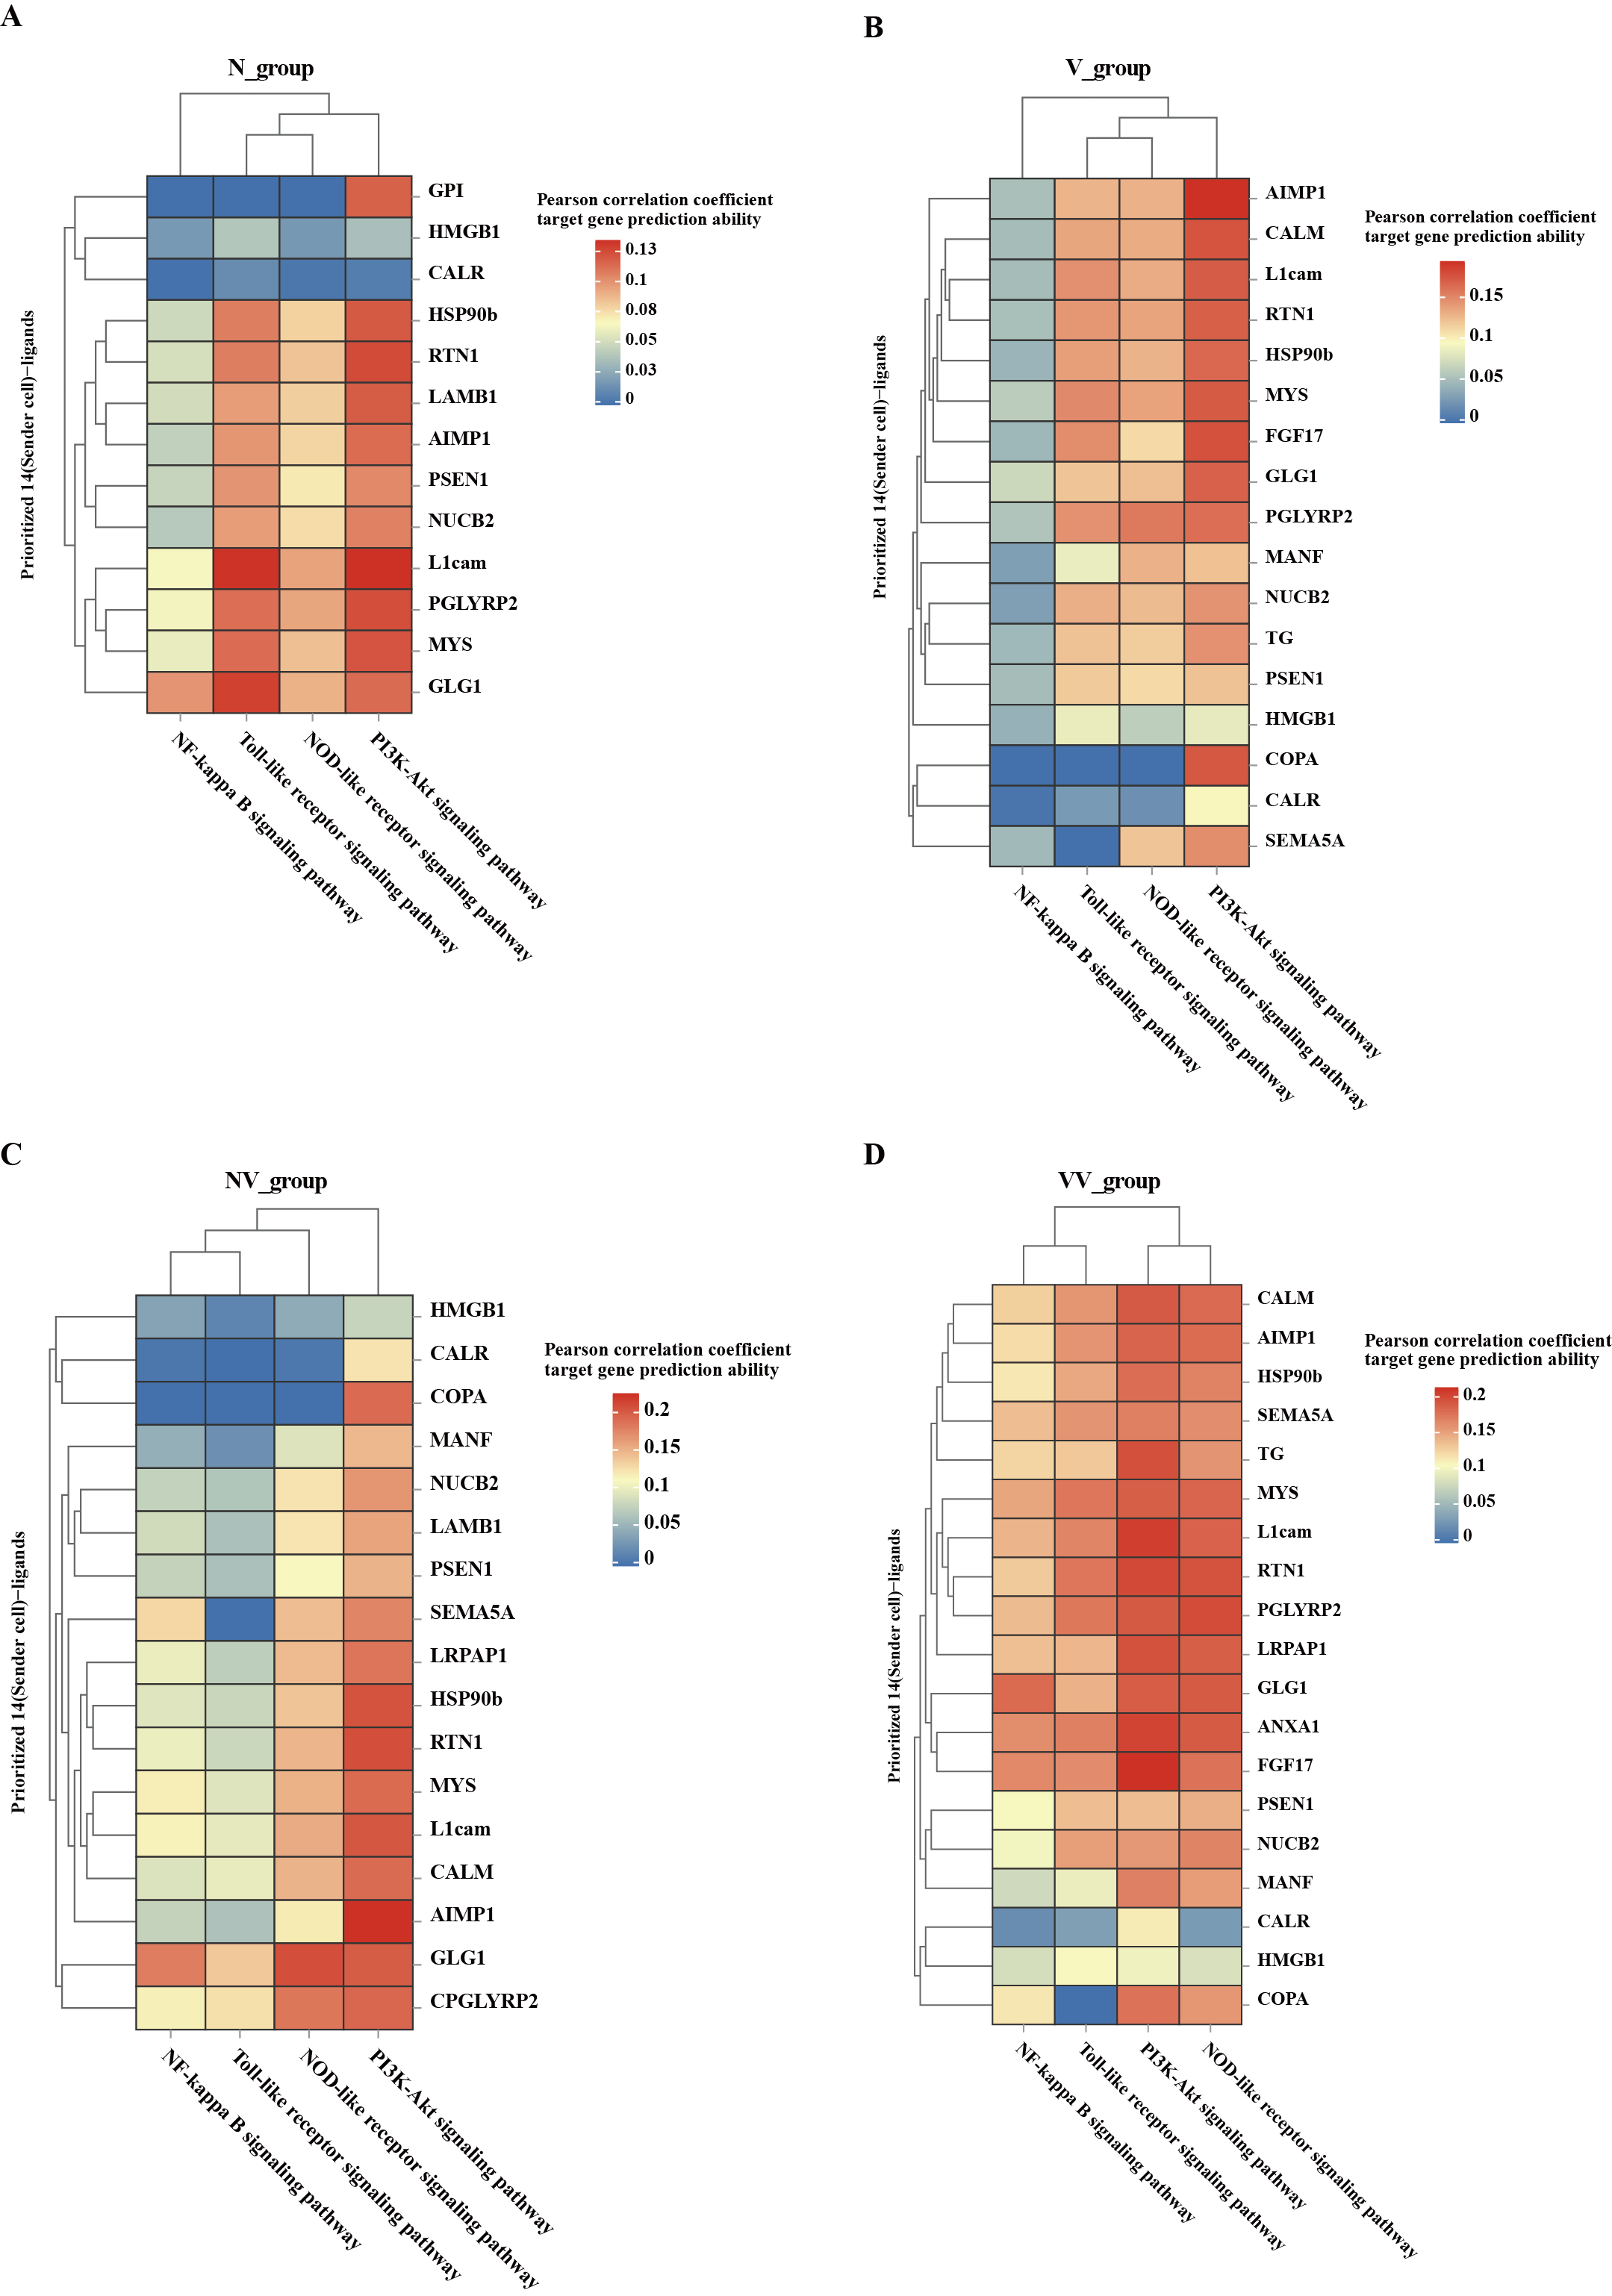


Fig. S4


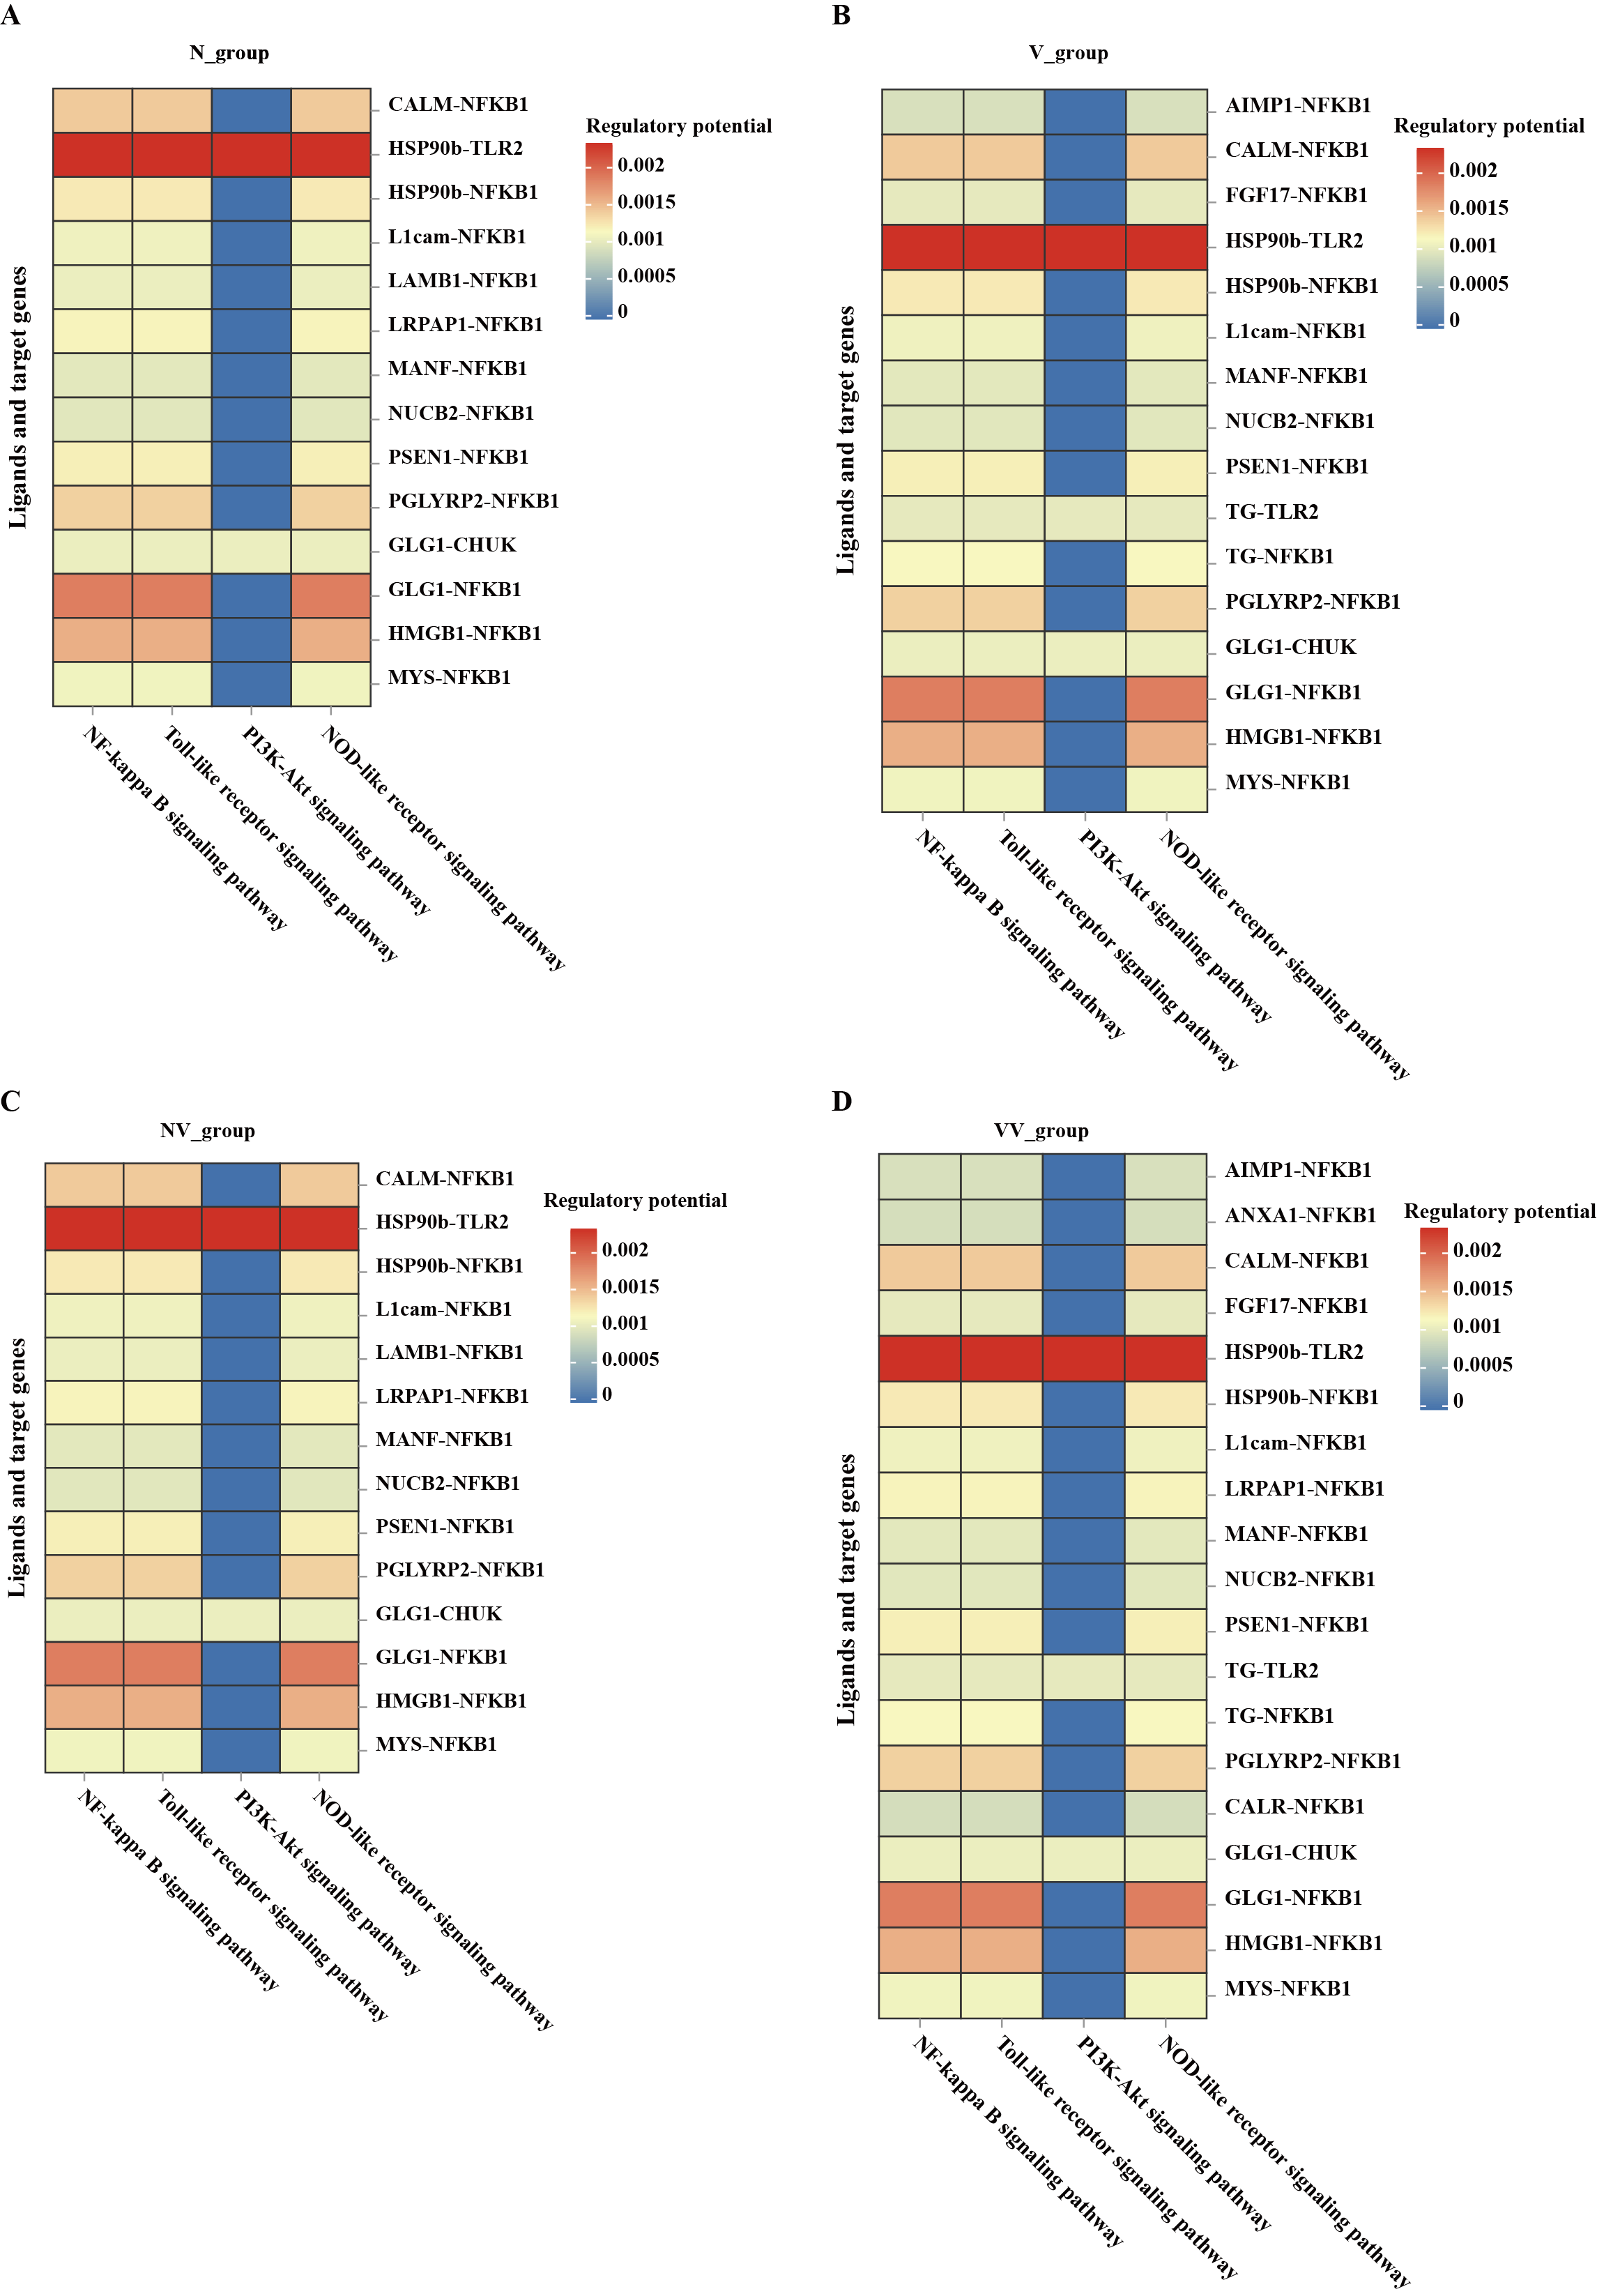


Fig. S5

Supplement: Supplementary file 2 [file 31fb64f2b80889463c74f207.docx]
